# Supplementary material for: TRIM21 depletion negatively regulates osteoclastogenesis via association with JNK2 to reduce nucleation of NFATc1
Source: Research Square preprint supplement (doi:10.21203/rs.3.rs-7540879/v1), 2025-10-30
Supplement: Supplementary file 1 [file 64b6d22425f971e623548ae8.docx]

**Declaration of competing interest**

The authors declare that they have no known competing financial interests or personal relationships that could have appeared to influence the work reported in this manuscript.
